# Supplementary material for: Characterization and identification of protein O-GlcNAcylation sites with substrate specificity
Source: PubMed Central journal article supplement (PMC4290634; doi:10.1186/1471-2105-15-s16-s1), 2014-12-08
Supplement: 1471-2105-15-S16-S1-S1.pdf [file 1471-2105-15-S16-S1-S1.pdf]

## Supplementary Figures S1-S2 and Tables S1-S4

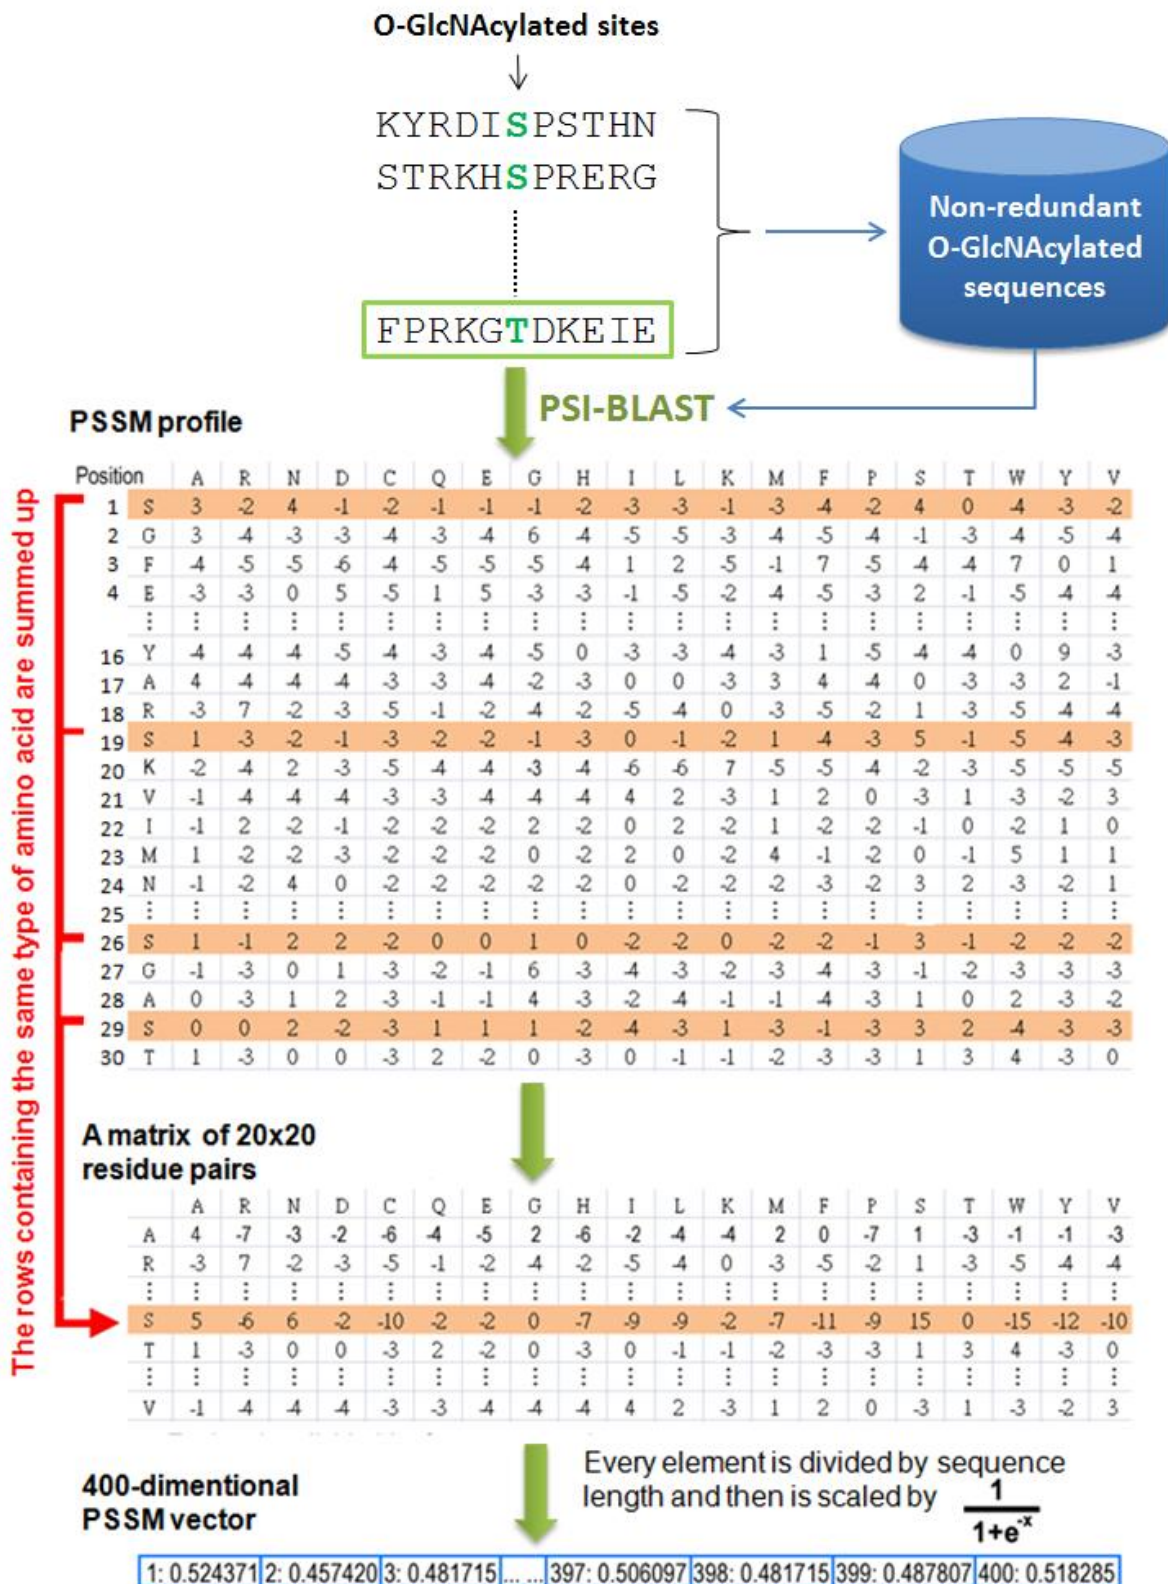

Figure S1. The encoding scheme of position-specific scoring matrix (PSSM) with 400-dimensional vector.

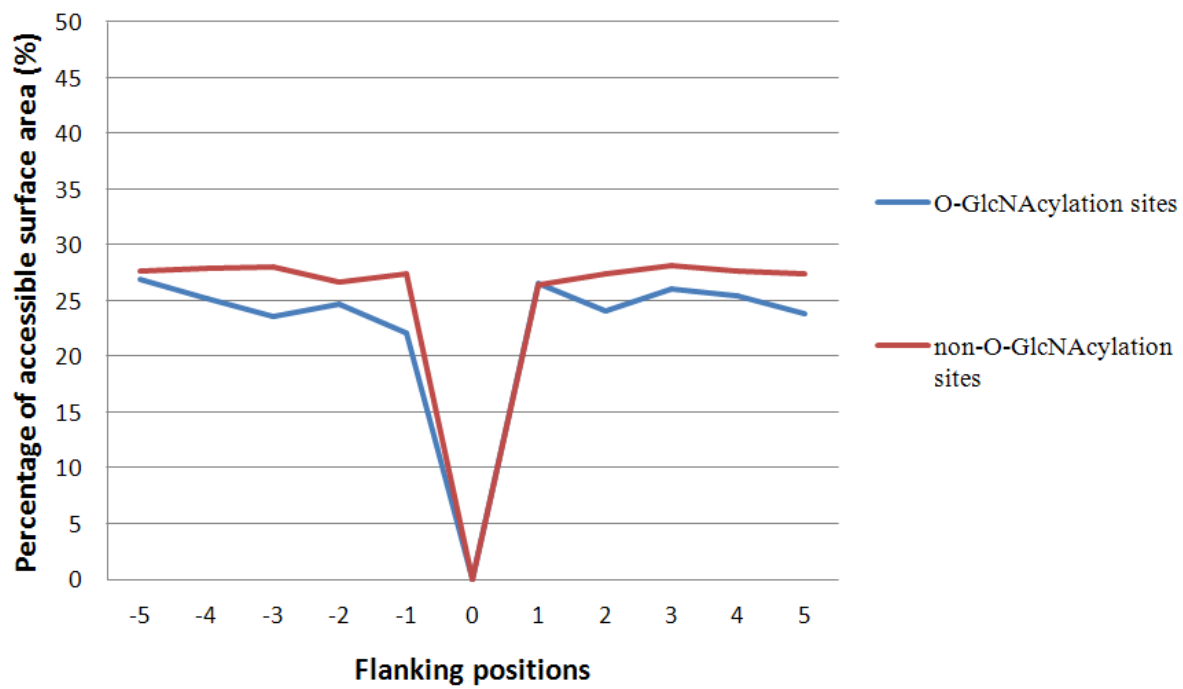

**Figure S2. Comparison of solvent-accessible surface area between O-GlcNAcylated and non-O-GlcNAcylated sites.**

**Table S1.** The amino acids group of MDDLogo used in this study.

| <b>Chemical properties</b> | <b>Amino acids</b>                                                                  |
|----------------------------|-------------------------------------------------------------------------------------|
| <b>Polar group</b>         | Glycine (G), Serine (S), Threonine (T), Cysteine (C), Glutamine (Q), Asparagine (N) |
| <b>Acidic group</b>        | Aspartic acid (D), Glutamic acid (E)                                                |
| <b>Basic group</b>         | Lysine (K), Arginine (R), Histidine (H)                                             |
| <b>Hydrophobic group</b>   | Alanine (A), Valine (V), Leucine (L), Isoleucine (I), Proline (P), Methionine (M)   |
| <b>Aromatic group</b>      | Phenylalanine (F), Tyrosine (Y), Tryptophan (W)                                     |

**Table S2.** The detailed independent testing results between our method and other three O-GlcNAcylation prediction tools.

| <b>Predictive tools</b> | <b>TP</b> | <b>FP</b> | <b>TN</b> | <b>FN</b> | <b>Sn</b> | <b>Sp</b> | <b>Acc</b> | <b>MCC</b> |
|-------------------------|-----------|-----------|-----------|-----------|-----------|-----------|------------|------------|
| Single SVM              | 683       | 21713     | 43282     | 365       | 0.65      | 0.67      | 0.67       | 0.08       |
| Two-layered SVMs        | 836       | 3934      | 61061     | 212       | 0.80      | 0.94      | 0.94       | 0.36       |
| YinOYang                | 482       | 12349     | 52646     | 566       | 0.46      | 0.81      | 0.80       | 0.08       |
| O-GlcNAcScan            | 430       | 5199      | 59796     | 618       | 0.41      | 0.92      | 0.92       | 0.15       |
| O-GlcNAcPRED            | 587       | 22748     | 42247     | 461       | 0.56      | 0.65      | 0.65       | 0.05       |

**Table S3. The phosphorylation and O-GlcNAcylation sites that located in the consensus sequence of subgroup OG1 with S/T residues at +4.**

**Entropy plot of OG1 sequence logo**

| Gene Symbol | O-GlcNAc site | Consensus Squence <sup>a</sup> | PubMed ID <sup>b</sup>                                   | Modification on +4 position <sup>c</sup> |
|-------------|---------------|--------------------------------|----------------------------------------------------------|------------------------------------------|
| ABLM3_MOUSE | 419           | LDVRS <u>S</u> TPTSY           | 19458039                                                 | O-GlcNAc                                 |
| AKT1_HUMAN  | 308           | GATMK <u>T</u> FCGTP           | 22629392<br>22322096                                     | O-GlcNAc<br>Phosphothreonine             |
| AKT1_HUMAN  | 473           | HFPQF <u>S</u> YSASG           | 22322096                                                 | Phosphoserine                            |
| BPTF_HUMAN  | 1749          | ENCAK <u>S</u> TVTTT           | 20068230                                                 | O-GlcNAc                                 |
| BPTF_HUMAN  | 2094          | KMVLV <u>T</u> KVGSP           | 18669648<br>19690332<br>20068231<br>21406692<br>19413330 | Phosphoserine                            |
| BSN_MOUSE   | 1395          | GSPAT <u>T</u> ASPTR           | 16452088                                                 | O-GlcNAc                                 |
| BSN_MOUSE   | 1407          | YMTPT <u>S</u> PAGSE           | 16452088<br>22645316                                     | O-GlcNAc                                 |
| BSN_MOUSE   | 2054          | DLRHP <u>T</u> DLLSH           | 16452088<br>22645316                                     | O-GlcNAc                                 |
| BSN_MOUSE   | 2070          | RYSSV <u>S</u> NIYSD           | 22645316<br>18034455                                     | O-GlcNAc<br>Phosphoserine                |
| BSN_MOUSE   | 2941          | LAGPT <u>T</u> VPATK           | 16452088<br>19458039<br>22645316                         | O-GlcNAc                                 |
| CEBPB_MOUSE | 180           | GSLST <u>S</u> SSSSP           | 15985551                                                 | Phosphoserine                            |

|             |     |       |          |       |                       |                  |
|-------------|-----|-------|----------|-------|-----------------------|------------------|
|             |     |       |          |       | 17110376 (GSK-3_beta) |                  |
|             |     |       |          |       | 17264204              |                  |
|             |     |       |          |       | 17601773              |                  |
|             |     |       |          |       | 19478079              |                  |
|             |     |       |          |       | 21183079              |                  |
|             |     |       |          |       | 21659604              |                  |
|             |     |       |          |       | 21659605              |                  |
|             |     |       |          |       | 22262865              |                  |
|             |     |       |          |       | 15985552              |                  |
| CRTC2_HUMAN | 173 | RTSSD | <u>S</u> | ALHTS | 19690332              | Phosphothreonine |
|             |     |       |          |       | 18669648              |                  |
| CTND2_MOUSE | 453 | GTFRT | <u>S</u> | TAPSS | 16452088              | O-GlcNAc         |
|             |     |       |          |       | 16452087              | Phosphoserine    |
|             |     |       |          |       | 16452087              |                  |
|             |     |       |          |       | 17114649              |                  |
| DEMA_MOUSE  | 285 | LHSGT | <u>S</u> | KSSSL | 18388127              | Phosphoserine    |
|             |     |       |          |       | 19737024              |                  |
|             |     |       |          |       | 20415495              |                  |
|             |     |       |          |       | 21183079              |                  |
| HCFC1_HUMAN | 579 | TTIVK | <u>T</u> | MAVTP | 20068231              | Phosphothreonine |
|             |     |       |          |       | 16083285              |                  |
|             |     |       |          |       | 9524113               |                  |
|             |     |       |          |       | 10623656              |                  |
|             |     |       |          |       | 14694114              |                  |
| K1C18_HUMAN | 30  | GARPV | <u>S</u> | SAASV | 18669648              | Phosphoserine    |
|             |     |       |          |       | 19415658              | (CDK1)           |
|             |     |       |          |       | 20044836              |                  |
|             |     |       |          |       | 20068231              |                  |
|             |     |       |          |       | 15368451              |                  |
|             |     |       |          |       | 19007248              |                  |
|             |     |       |          |       | 10623656              |                  |
|             |     |       |          |       | 18669648              | Phosphoserine    |
|             |     |       |          |       | 20044836              | (PKC_epsilon;CAM |
| K1C18_HUMAN | 49  | SRISV | <u>S</u> | RSTSF | 20068231              | K2A;PRKCA;PRKC   |
|             |     |       |          |       | 17081983              | E;RPS6KA3;AURK   |
|             |     |       |          |       | 7523419               | A)               |
|             |     |       |          |       | 1374067               |                  |
|             |     |       |          |       | 17924679              |                  |

|            |     |       |                |          |                |
|------------|-----|-------|----------------|----------|----------------|
|            |     |       |                | 19007248 |                |
|            |     |       |                | 15368451 |                |
|            |     |       |                | 16424149 |                |
|            |     |       |                | 17192257 |                |
| KCC4_HUMAN | 356 | ESHKA | <u>S</u> RDPSP | 19690332 | Phosphoserine  |
|            |     |       |                | 20363803 | (CAMK4)        |
|            |     |       |                | 19413330 |                |
|            |     |       |                | 17081983 |                |
| LMNA_HUMAN | 612 | VGGPI | <u>S</u> SGSSA | 18669648 | Phosphoserine  |
|            |     |       |                | 19691289 |                |
|            |     |       |                | 20068231 |                |
|            |     |       |                | 10551811 |                |
|            |     |       |                | 10866684 |                |
|            |     |       |                | 11018017 |                |
|            |     |       |                | 11243879 |                |
|            |     |       |                | 11904304 |                |
|            |     |       |                | 14563837 |                |
|            |     |       |                | 15103331 |                |
|            |     |       |                | 15150404 |                |
|            |     |       |                | 15175348 |                |
|            |     |       |                | 15210690 |                |
|            |     |       |                | 16452238 |                |
|            |     |       |                | 16483932 |                |
|            |     |       |                | 1651323  | Phosphoserine  |
| MYC_HUMAN  | 58  | FELLP | <u>T</u> PPLSP | 16537924 | (MAPK1;GSK3;CD |
|            |     |       |                | 16855632 | K2)            |
|            |     |       |                | 17157259 |                |
|            |     |       |                | 17634226 |                |
|            |     |       |                | 18220336 |                |
|            |     |       |                | 18408012 |                |
|            |     |       |                | 18669648 |                |
|            |     |       |                | 18701488 |                |
|            |     |       |                | 19028839 |                |
|            |     |       |                | 19131971 |                |
|            |     |       |                | 20068231 |                |
|            |     |       |                | 20140016 |                |
|            |     |       |                | 21406692 |                |
|            |     |       |                | 21659604 |                |

|             |      |       |          |                    |          |                  |
|-------------|------|-------|----------|--------------------|----------|------------------|
|             |      |       |          |                    | 21808024 |                  |
|             |      |       |          |                    | 22025562 |                  |
|             |      |       |          |                    | 22115753 |                  |
|             |      |       |          |                    | 8386367  |                  |
|             |      |       |          |                    | 17081983 |                  |
|             |      |       |          |                    | 17558397 |                  |
|             |      |       |          |                    | 19966300 |                  |
|             |      |       |          |                    | 20713526 |                  |
| MYH6_RAT    | 622  | MATLF | <u>S</u> | TYASA              | 18988896 | O-GlcNAc         |
| NCOR1_HUMAN | 1487 | RRTPV | <u>S</u> | YQNTM              | 17081983 | Phosphothreonine |
| NFL_MOUSE   | 48   | YSAPV | <u>S</u> | SSL <del>SV</del>  | 16452088 | O-GlcNAc         |
| NFM_MOUSE   | 46   | SRGSP | <u>S</u> | TVSS <del>SS</del> | 16452088 | O-GlcNAc         |
| NFM_MOUSE   | 47   | RGSPS | <u>T</u> | VSS <del>SY</del>  | 16452088 | O-GlcNAc         |
| P121A_HUMAN | 693  | TKPQA | <u>T</u> | SAP <del>SP</del>  | 18669648 | Phosphoserine    |
|             |      |       |          |                    | 19413330 |                  |
|             |      |       |          |                    | 17081983 |                  |
|             |      |       |          |                    | 18669648 |                  |
|             |      |       |          |                    | 19664995 |                  |
|             |      |       |          |                    | 19651622 |                  |
| RRP1B_HUMAN | 731  | LKTPT | <u>S</u> | SPASS              | 19691289 | Phosphoserine    |
|             |      |       |          |                    | 20068231 |                  |
|             |      |       |          |                    | 19690332 |                  |
|             |      |       |          |                    | 21659604 |                  |
|             |      |       |          |                    | 22115753 |                  |
| SHAN2_MOUSE | 1292 | PEVMS | <u>T</u> | VSGTR              | 16452088 | O-GlcNAc         |
| SKT_MOUSE   | 357  | SSLPV | <u>S</u> | RSISP              | 19367708 | Phosphoserine    |
|             |      |       |          |                    | 16332679 |                  |
|             |      |       |          |                    | 15561949 |                  |
| SP1_RAT     | 699  | KRFMR | <u>S</u> | DHL <del>SK</del>  | 12900380 | O-GlcNAc         |
|             |      |       |          |                    | 9111324  | Phosphoserine    |
|             |      |       |          |                    | 16365142 |                  |
|             |      |       |          |                    | 16052526 |                  |
|             |      |       |          |                    | 17081983 |                  |
| SPTB2_HUMAN | 2324 | STPAS | <u>S</u> | RAQ <del>TL</del>  | 18669648 | Phosphothreonine |
|             |      |       |          |                    | 19651622 |                  |
|             |      |       |          |                    | 19362540 |                  |
| SRBS1_MOUSE | 1201 | LPYSS | <u>S</u> | PSR <del>SA</del>  | 20139300 | Phosphoserine    |
|             |      |       |          |                    | 21183079 |                  |

|             |     |       |          |       |                                                                                                                                                                                             |                              |
|-------------|-----|-------|----------|-------|---------------------------------------------------------------------------------------------------------------------------------------------------------------------------------------------|------------------------------|
| SRF_HUMAN   | 309 | APVSA | <u>S</u> | VSPSA | 1512232<br>12684542                                                                                                                                                                         | O-GlcNAc                     |
| SYN1_MOUSE  | 564 | GAPQA | <u>T</u> | RQASI | 16452087<br>19737024<br>20415495                                                                                                                                                            | Phosphoserine                |
| SYN1_RAT    | 562 | GPPQA | <u>T</u> | RQASI | 3118371                                                                                                                                                                                     | Phosphoserine<br>(CaMK2)     |
| TAU_RAT     | 711 | KSPVV | <u>S</u> | GDTSP | 15249677<br>15375165<br>15719129<br>15992372<br>16397900<br>16452087<br>16675464<br>17085446<br>17537547<br>18245083<br>18587388<br>19054758<br>19451179<br>20308788<br>21489990<br>8245007 | Phosphoserine<br>(CK1;PDPK1) |
| VIME_HUMAN  | 34  | SYVTT | <u>S</u> | TRTYS | 18083107<br>20090780<br>21253578                                                                                                                                                            | Phosphotyrosine              |
| YTHD3_MOUSE | 201 | IGGDL | <u>T</u> | AAVTK | 22645316                                                                                                                                                                                    | O-GlcNAc                     |
| ZC3HE_HUMAN | 369 | ESVTK | <u>T</u> | TNYST | 19413330                                                                                                                                                                                    | Phosphoserine                |

<sup>a</sup>Residues colored by blue is the annotated O-GlcNAylation sites in the training data.

<sup>b</sup>PubMed ID that reported the modification on +4 position to the central residue

<sup>c</sup>Reported phosphorylation or O-GlcNAcylation on +4 position



**Table S4. The phosphorylation and O-GlcNAcylation sites that located in the consensus sequence of subgroup OG2 with S/T residues at +1.**

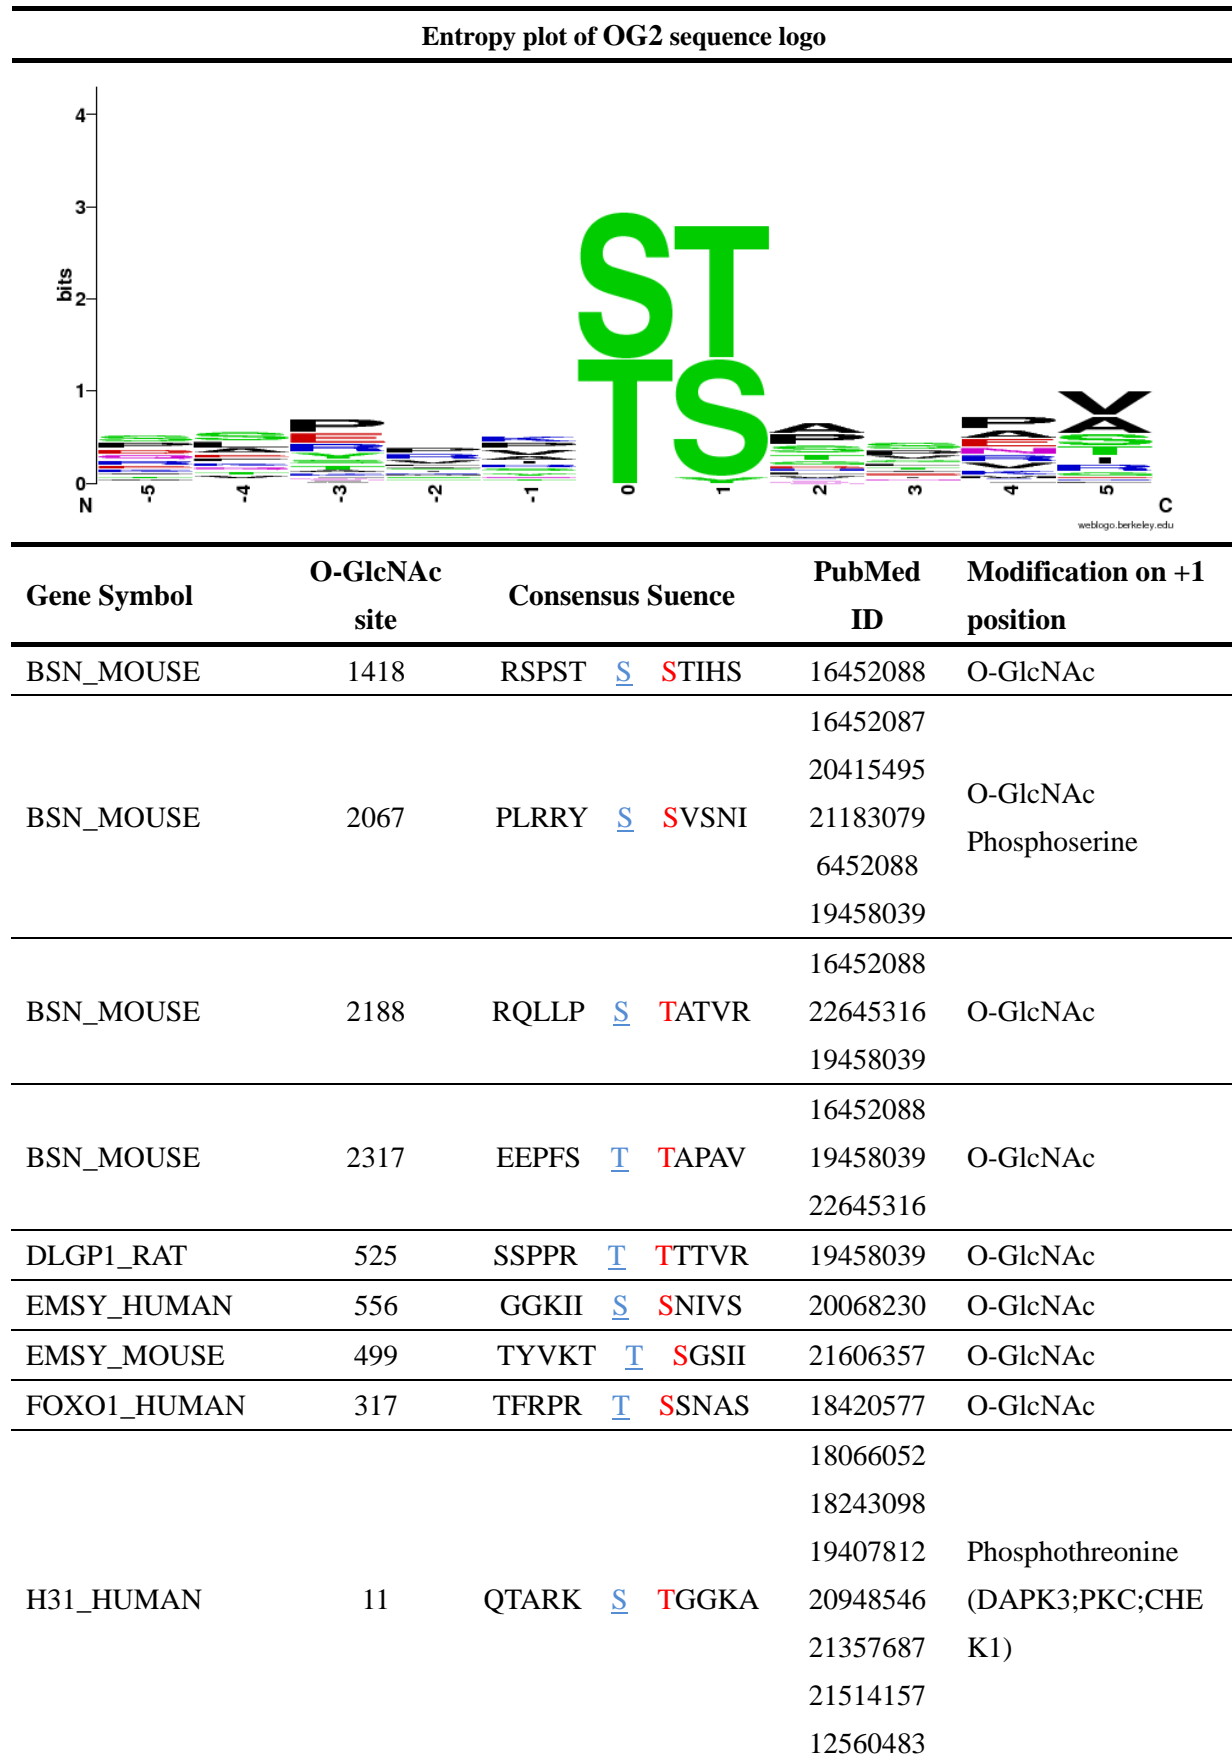

|             |      |                      |                                                                     |                              |
|-------------|------|----------------------|---------------------------------------------------------------------|------------------------------|
| HCFC1_HUMAN | 800  | PITII <u>T</u> TKVMT | 20068230<br>23335398                                                | O-GlcNAc                     |
| K2C8_HUMAN  | 13   | KSYKV <u>S</u> TSGPR | 19007248                                                            | Phosphothreonine             |
| KPCG_RAT    | 689  | DARSP <u>T</u> SPVPV | 18295358                                                            | O-GlcNAc                     |
| LT_SV40     | 111  | SEEMP <u>S</u> SDDEA | 9499386                                                             | O-GlcNAc<br>Phosphoserine    |
| MYH6_RAT    | 1470 | QSELE <u>S</u> SQKEA | 18988896                                                            | O-GlcNAc                     |
| NU153_HUMAN | 1112 | QQEPV <u>T</u> STSLV | 20068230                                                            | O-GlcNAc                     |
| NUP98_HUMAN | 567  | PKALQ <u>T</u> TGTAQ | 20068230                                                            | O-GlcNAc                     |
| P53_HUMAN   | 149  | QLWVD <u>S</u> TPPPG | 11285227<br>12628923<br>17906639<br>21127074                        | Phosphothreonine             |
| PCLO_MOUSE  | 2686 | DVKRQ <u>T</u> TANEV | 22645316                                                            | O-GlcNAc                     |
| PCLO_MOUSE  | 2889 | AQQA <u>T</u> TLPED  | 16452088<br>19458039<br>119458039<br>15648052<br>22645316           | O-GlcNAc                     |
| PCLO_MOUSE  | 2993 | STPQY <u>S</u> TARMT | 16452088                                                            | O-GlcNAc                     |
| PHB_HUMAN   | 258  | RSRNI <u>T</u> YLPAG | 19238206<br>22410782                                                | Phosphotyrosine              |
| RBP2_HUMAN  | 1399 | VFTPQ <u>T</u> SPENV | 20068230<br>18669648<br>19651622<br>20068231                        | O-GlcNAc<br>Phosphoserine    |
| RPRD2_HUMAN | 399  | EKSAV <u>S</u> TSVPT | 20068230<br>19413330                                                | O-GlcNAc<br>Phosphothreonine |
| SON_HUMAN   | 252  | AAPVP <u>T</u> TTLVL | 20068230                                                            | O-GlcNAc                     |
| SP1_RAT     | 641  | KVYGK <u>T</u> SHLRA | 16332679<br>15561949<br>12900380<br>9111324<br>16365142<br>16052526 | O-GlcNAc<br>Phosphoserine    |
| SRBS1_MOUSE | 1200 | DLPYS <u>S</u> SPSRS | 16452088<br>15648052                                                | O-GlcNAc<br>Phosphoserine    |

|             |      |       |                |          |                  |
|-------------|------|-------|----------------|----------|------------------|
|             |      |       |                | 18056256 |                  |
|             |      |       |                | 19367708 |                  |
|             |      |       |                | 19737024 |                  |
|             |      |       |                | 21183079 |                  |
|             |      |       |                | 21659604 |                  |
|             |      |       |                | 16452088 |                  |
| SYN1_MOUSE  | 55   | SAERA | <u>S</u> TAAPV | 19004831 | GlcNAc           |
|             |      |       |                | 16452087 | Phosphothreonine |
|             |      |       |                | 18669648 |                  |
| TPR_HUMAN   | 1676 | PTPVV | <u>S</u> TPSKV | 19413330 | Phosphothreonine |
|             |      |       |                | 17446864 |                  |
|             |      |       |                | 18847512 |                  |
| UBP2L_HUMAN | 782  | RSSVA | <u>T</u> TSGKA | 20068230 | O-GlcNAc         |
| ZFR_HUMAN   | 148  | YSYVR | <u>S</u> TAPAV | 20068230 | O-GlcNAc         |
